# Supplementary material for: Cinnamic Acid Attenuates Peripheral and Hypothalamic Inflammation in High-Fat Diet-Induced Obese Mice
Source: MDPI journal article supplement (doi:10.3390/pharmaceutics14081675), 2022-08-11
Supplement: s1 [file s1]

**Supplementary Table S1. A list of 82 active compounds in the Cinnamon**

| Compound                                                 | Molecular Formula                               | Molecular Weight (g/mol) |
|----------------------------------------------------------|-------------------------------------------------|--------------------------|
| (3-ethoxy-hexa-1,5-dienyl)-benzene                       | C <sub>14</sub> H <sub>18</sub> O               | 202.29                   |
| 1-heptadecene                                            | C <sub>17</sub> H <sub>34</sub>                 | 238.45                   |
| 1,8-cineole                                              | C <sub>10</sub> H <sub>18</sub> O               | 154.25                   |
| 3-methylbenzothiophene                                   | C <sub>9</sub> H <sub>8</sub> S                 | 148.22                   |
| 4-(2-propenyl)-phenol                                    | C <sub>9</sub> H <sub>10</sub> O                | 134.18                   |
| 5-(2-propenyl)-1,3-benzodioxole                          | C <sub>10</sub> H <sub>10</sub> O <sub>2</sub>  | 162.19                   |
| 6-Glucopyranosylprocyanidin B1                           | C <sub>36</sub> H <sub>36</sub> O <sub>17</sub> | 740.7                    |
| aromadendrene                                            | C <sub>15</sub> H <sub>24</sub>                 | 204.35                   |
| benzaldehyde                                             | C <sub>7</sub> H <sub>6</sub> O                 | 106.12                   |
| benzeneethanol                                           | C <sub>8</sub> H <sub>10</sub> O                | 122.16                   |
| benzenemethanol                                          | C <sub>7</sub> H <sub>8</sub> O                 | 108.14                   |
| benzenepropanol                                          | C <sub>9</sub> H <sub>12</sub> O                | 136.19                   |
| benzyl benzoate                                          | C <sub>14</sub> H <sub>12</sub> O <sub>2</sub>  | 212.24                   |
| bicyclogermacrene                                        | C <sub>15</sub> H <sub>24</sub>                 | 204.35                   |
| borneol                                                  | C <sub>10</sub> H <sub>18</sub> O               | 154.25                   |
| caffeic acid                                             | C <sub>9</sub> H <sub>8</sub> O <sub>4</sub>    | 180.16                   |
| camphor                                                  | C <sub>10</sub> H <sub>16</sub> O               | 152.23                   |
| caryophyllene                                            | C <sub>15</sub> H <sub>24</sub>                 | 204.35                   |
| catechin                                                 | C <sub>15</sub> H <sub>14</sub> O <sub>6</sub>  | 290.27                   |
| chlorogenic acid                                         | C <sub>16</sub> H <sub>18</sub> O <sub>9</sub>  | 354.31                   |
| cinnamaldehyde                                           | C <sub>9</sub> H <sub>8</sub> O                 | 132.16                   |
| cinnamic acid                                            | C <sub>9</sub> H <sub>8</sub> O <sub>2</sub>    | 148.16                   |
| cinnamtannin-B1                                          | C <sub>45</sub> H <sub>36</sub> O <sub>18</sub> | 864.76                   |
| cinnamyl acetate                                         | C <sub>11</sub> H <sub>12</sub> O <sub>2</sub>  | 176.21                   |
| cinnamyl alcohol                                         | C <sub>9</sub> H <sub>10</sub> O                | 134.18                   |
| cis-isoeugenol                                           | C <sub>10</sub> H <sub>12</sub> O <sub>2</sub>  | 164.2                    |
| copaene                                                  | C <sub>15</sub> H <sub>24</sub>                 | 204.35                   |
| coumarin                                                 | C <sub>9</sub> H <sub>6</sub> O <sub>2</sub>    | 146.14                   |
| cubenol                                                  | C <sub>15</sub> H <sub>26</sub> O               | 222.37                   |
| cymene                                                   | C <sub>10</sub> H <sub>14</sub>                 | 134.22                   |
| docosane                                                 | C <sub>22</sub> H <sub>46</sub>                 | 310.6                    |
| epicatechin                                              | C <sub>15</sub> H <sub>14</sub> O <sub>6</sub>  | 290.27                   |
| eugenol                                                  | C <sub>10</sub> H <sub>12</sub> O <sub>2</sub>  | 164.2                    |
| eugenol acetate                                          | C <sub>12</sub> H <sub>14</sub> O <sub>3</sub>  | 206.24                   |
| ferulic acid                                             | C <sub>10</sub> H <sub>10</sub> O <sub>4</sub>  | 194.18                   |
| gallic acid                                              | C <sub>7</sub> H <sub>6</sub> O <sub>5</sub>    | 170.12                   |
| germacrene-d                                             | C <sub>15</sub> H <sub>24</sub>                 | 204.35                   |
| hydrocinnamaldehyde                                      | C <sub>9</sub> H <sub>10</sub> O                | 134.18                   |
| isopathulenol                                            | C <sub>15</sub> H <sub>24</sub> O               | 220.35                   |
| kaempferol 3- $\alpha$ -L-arabinofuranoside-7-rhamnoside | C <sub>26</sub> H <sub>28</sub> O <sub>14</sub> | 564.5                    |
| limonene                                                 | C <sub>10</sub> H <sub>16</sub>                 | 136.23                   |
| linalool                                                 | C <sub>10</sub> H <sub>18</sub> O               | 154.25                   |
| methoxy-eugenol                                          | C <sub>11</sub> H <sub>14</sub> O <sub>3</sub>  | 194.23                   |
| neohexane                                                | C <sub>6</sub> H <sub>14</sub>                  | 86.18                    |

|                               |                                                 |        |
|-------------------------------|-------------------------------------------------|--------|
| neophytadiene                 | C <sub>20</sub> H <sub>38</sub>                 | 278.52 |
| nonadecene                    | C <sub>19</sub> H <sub>38</sub>                 | 266.51 |
| octacosane                    | C <sub>28</sub> H <sub>58</sub>                 | 394.76 |
| ortho-methoxy cinnamaldehyde  | C <sub>10</sub> H <sub>10</sub> O <sub>2</sub>  | 162.18 |
| <i>p</i> -coumaric acid       | C <sub>9</sub> H <sub>8</sub> O <sub>3</sub>    | 164.16 |
| <i>p</i> -cymene              | C <sub>10</sub> H <sub>14</sub>                 | 134.22 |
| <i>p</i> -hydroxybenzoic acid | C <sub>7</sub> H <sub>6</sub> O <sub>3</sub>    | 138.12 |
| <i>p</i> -vinylbenzohydrazide | C <sub>9</sub> H <sub>10</sub> N <sub>2</sub> O | 162.19 |
| pavetannin-C1                 | C <sub>60</sub> H <sub>48</sub> O <sub>24</sub> | 1153   |
| proanthocyanidin-A2           | C <sub>30</sub> H <sub>24</sub> O <sub>12</sub> | 576.5  |
| procyanidin-B7                | C <sub>30</sub> H <sub>26</sub> O <sub>12</sub> | 578.5  |
| protocatechuic acid           | C <sub>7</sub> H <sub>6</sub> O <sub>4</sub>    | 154.12 |
| quercetin                     | C <sub>15</sub> H <sub>10</sub> O <sub>7</sub>  | 302.24 |
| rosmarinic acid               | C <sub>18</sub> H <sub>16</sub> O <sub>8</sub>  | 360.31 |
| safrole                       | C <sub>10</sub> H <sub>10</sub> O <sub>2</sub>  | 162.19 |
| salicylic acid                | C <sub>7</sub> H <sub>6</sub> O <sub>3</sub>    | 138.12 |
| sinapic acid                  | C <sub>11</sub> H <sub>12</sub> O <sub>5</sub>  | 224.21 |
| spathulenol                   | C <sub>15</sub> H <sub>24</sub> O               | 220.35 |
| syringic acid                 | C <sub>9</sub> H <sub>10</sub> O <sub>5</sub>   | 198.17 |
| tenuifolin                    | C <sub>36</sub> H <sub>56</sub> O <sub>12</sub> | 680.8  |
| terpinen-4-ol                 | C <sub>10</sub> H <sub>18</sub> O               | 154.25 |
| tetracosane                   | C <sub>24</sub> H <sub>50</sub>                 | 338.65 |
| trans-cinnamaldehyde          | C <sub>9</sub> H <sub>8</sub> O                 | 132.16 |
| vanillic acid                 | C <sub>8</sub> H <sub>8</sub> O <sub>4</sub>    | 168.15 |
| vanillin                      | C <sub>8</sub> H <sub>8</sub> O <sub>3</sub>    | 152.15 |
| viridiflorol                  | C <sub>15</sub> H <sub>26</sub> O               | 222.37 |
| α-amorphene                   | C <sub>15</sub> H <sub>24</sub>                 | 204.35 |
| α-caryophyllene               | C <sub>15</sub> H <sub>24</sub>                 | 204.35 |
| α-copaene                     | C <sub>15</sub> H <sub>24</sub>                 | 204.35 |
| α-muurolene                   | C <sub>15</sub> H <sub>24</sub>                 | 204.35 |
| α-phellandrene                | C <sub>10</sub> H <sub>16</sub>                 | 136.23 |
| α-Pinene                      | C <sub>10</sub> H <sub>16</sub>                 | 136.23 |
| α-terpineol                   | C <sub>10</sub> H <sub>18</sub> O               | 154.25 |
| α-thujene                     | C <sub>10</sub> H <sub>16</sub>                 | 136.23 |
| β-bisabolene                  | C <sub>15</sub> H <sub>24</sub>                 | 204.35 |
| β-caryophyllene               | C <sub>15</sub> H <sub>24</sub>                 | 204.35 |
| β-terpinene                   | C <sub>10</sub> H <sub>16</sub>                 | 136.23 |
| δ-elemene                     | C <sub>15</sub> H <sub>24</sub>                 | 204.35 |

---

**Supplementary Table S2. Number of violations of cinnamon compounds for “drug likeness” via different pharmacokinetic filters**

| Compound                      | Filters <sup>a</sup> for drug likeness |       |       |      |        | Bioavailability Score |
|-------------------------------|----------------------------------------|-------|-------|------|--------|-----------------------|
|                               | Lipinski                               | Ghose | Veber | Egan | Muegge |                       |
| Cinnamic acid                 | 0                                      | 2     | 0     | 0    | 1      | 0.85                  |
| Ferulic acid                  | 0                                      | 0     | 0     | 0    | 1      | 0.85                  |
| <i>p</i> -Coumaric acid       | 0                                      | 0     | 0     | 0    | 1      | 0.85                  |
| <i>p</i> -Hydroxybenzoic acid | 0                                      | 3     | 0     | 0    | 1      | 0.85                  |
| Salicylic acid                | 0                                      | 3     | 0     | 0    | 1      | 0.85                  |

<sup>a</sup> Lipinski’s filter: MW ≤ 500 Da, number of H-bond donors ≤ 5, number of H-bond acceptors ≤ 10, logarithm of octanol-water partition coefficient (logP) ≤ 5;

Ghose’s filter: 160 ≤ MW ≤ 480, −0.4 ≤ WLOGP (lipophilicity) ≤ 5.6, 40 ≤ the molar refractivity ≤ 130, 20 ≤ number of atoms ≤ 70;

Veber’s filter: the number of rotatable bonds ≤ 10, the total polar surface area ≤ 140;

Egan’s filter: WLOGP (lipophilicity) ≤ 5.88, the total polar surface area ≤ 131;

Muegge’s filter, 200 ≤ MW ≤ 600, −2 ≤ XLOGP3 (lipophilicity) ≤ 5, the total polar surface area ≤ 150, the number of rings ≤ 7, the number of carbons > 4, the number of heteroatoms > 1, the number of rotatable bonds ≤ 15, number of H-bond acceptors ≤ 10, number of H-bond donors ≤ 5.

**Supplementary Table S3. Physicochemical properties of cinnamon compounds**

| Compound                      | Physicochemical Properties                     |        |              |                       |               |                  |                   |                |       |       |
|-------------------------------|------------------------------------------------|--------|--------------|-----------------------|---------------|------------------|-------------------|----------------|-------|-------|
|                               | Formula                                        | MW     | #Heavy atoms | #Aromatic heavy atoms | Fraction Csp3 | #Rotatable bonds | #H-bond acceptors | #H-bond donors | MR    | TPSA  |
| Cinnamic acid                 | C <sub>9</sub> H <sub>8</sub> O <sub>2</sub>   | 148.16 | 11           | 6                     | 0             | 2                | 2                 | 1              | 43.11 | 37.3  |
| ferulic acid                  | C <sub>10</sub> H <sub>10</sub> O <sub>4</sub> | 194.18 | 14           | 6                     | 0.1           | 3                | 4                 | 2              | 51.63 | 66.76 |
| <i>p</i> -coumaric acid       | C <sub>9</sub> H <sub>8</sub> O <sub>3</sub>   | 164.16 | 12           | 6                     | 0             | 2                | 3                 | 2              | 45.13 | 57.53 |
| <i>p</i> -hydroxybenzoic acid | C <sub>7</sub> H <sub>6</sub> O <sub>3</sub>   | 138.12 | 10           | 6                     | 0             | 1                | 3                 | 2              | 35.42 | 57.53 |
| salicylic acid                | C <sub>7</sub> H <sub>6</sub> O <sub>3</sub>   | 138.12 | 10           | 6                     | 0             | 1                | 3                 | 2              | 35.42 | 57.53 |

MW, molecular weight; Fraction Csp3, ratio of sp<sup>3</sup> hybridized carbons over the total carbon count of the molecule; MR, molecular refractivity; TPSA, topological polar surface area.

**Supplementary Table S4. Lipophilicity of cinnamon compounds**

| Compound                      | Lipophilicity |        |       |       |                  |                 |
|-------------------------------|---------------|--------|-------|-------|------------------|-----------------|
|                               | iLOGP         | XLOGP3 | WLOGP | MLOGP | Silicos-IT Log P | Consensus Log P |
| Cinnamic acid                 | 1.55          | 2.13   | 1.68  | 1.9   | 1.7              | 1.79            |
| Ferulic acid                  | 1.62          | 1.51   | 1.39  | 1     | 1.26             | 1.36            |
| <i>p</i> -Coumaric acid       | 0.95          | 1.46   | 1.38  | 1.28  | 1.22             | 1.26            |
| <i>p</i> -Hydroxybenzoic acid | 0.85          | 1.58   | 1.09  | 0.99  | 0.74             | 1.05            |
| Salicylic acid                | 1.13          | 2.26   | 1.09  | 0.99  | 0.74             | 1.24            |

iLOGP, implicit log *P* is an in-house physics-based methods relying on Gibbs free energy of solvation calculated by GB/SA in water and *n*-octanol; XLOGP3, the logP value of a query compound by using the known logP value of a reference compound as a starting point; WLOGP, log P method developed by Wildman and Crippen; MLOGP, Moriguchi octanol-water partition coefficient; SILICOS-IT, an hybrid method relying on 27 fragments and 7 topological descriptors; Consensus Log P, arithmetic mean of the values predicted by the five proposed methods.

**Supplementary Table S5. Water solubility of cinnamon compounds**

| Compound                      | Water Solubility |         |         |                |         |          |                       |         |         |
|-------------------------------|------------------|---------|---------|----------------|---------|----------|-----------------------|---------|---------|
|                               | ESOL Solubility  |         |         | Ali Solubility |         |          | Silicos-IT Solubility |         |         |
|                               | Log S            | (mg/ml) | (mol/l) | Log S          | (mg/ml) | (mol/l)  | LogSw                 | (mg/ml) | (mol/l) |
| Cinnamic acid                 | -2.37            | -2.37   | 0.629   | -2.54          | 0.423   | 0.002850 | -1.84                 | 2.14    | 0.0145  |
| Ferulic acid                  | -2.16            | -2.11   | 1.490   | -2.52          | 0.586   | 0.003020 | -1.42                 | 7.43    | 0.0383  |
| <i>p</i> -Coumaric acid       | -2.17            | -2.02   | 1.580   | -2.27          | 0.873   | 0.005320 | -1.28                 | 8.67    | 0.0528  |
| <i>p</i> -Hydroxybenzoic acid | -2.43            | -2.07   | 1.180   | -2.4           | 0.551   | 0.003990 | -1.17                 | 9.40    | 0.0681  |
| Salicylic acid                | -2.46            | -2.5    | 0.439   | -3.1           | 0.109   | 0.000786 | -1.17                 | 9.40    | 0.0681  |

ESOL, Estimating Aqueous Solubility Directly from Molecular Structure; Ali, *in silico* prediction model of aqueous solubility revised by Ali J.; Silicos-IT, predictor for solubility developed by SILICOS-IT; LogSw, decimal logarithm of the molar solubility in water.

**Supplementary Table S6. Pharmacokinetics of cinnamon compounds**

| Compound                      | Pharmacokinetics |       |       |                |        |       |       |       |               |
|-------------------------------|------------------|-------|-------|----------------|--------|-------|-------|-------|---------------|
|                               | GI               | BBB   | Pgp   | CYP inhibition |        |       |       |       | log Kp (cm/s) |
|                               |                  |       |       | 1A2            | 2C19 i | 2C9   | 2D6   | 3A4   |               |
| Cinnamic acid                 | -4.388           | 0.961 | 0.059 | 0.082          | 0.036  | 0.021 | 0.117 | 0.001 | -5.69         |
| Ferulic acid                  | -4.943           | 0.565 | 0.026 | 0.234          | 0.061  | 0.059 | 0.184 | 0.012 | -6.41         |
| <i>p</i> -Coumaric acid       | -4.884           | 0.451 | 0.036 | 0.054          | 0.035  | 0.087 | 0.218 | 0.011 | -6.26         |
| <i>p</i> -Hydroxybenzoic acid | -4.844           | 0.18  | 0.019 | 0.023          | 0.006  | 0.007 | 0.111 | 0.001 | -6.02         |
| salicylic acid                | -4.851           | 0.379 | 0.027 | 0.003          | 0.013  | 0.007 | 0.103 | 0.001 | -5.54         |

GI, gastrointestinal absorption; BBB, blood-brain barrier permeant; Pgp, permeability glycoprotein substrate; CYP, cytochrome P450; log Kp, decimal logarithm of the skin permeability coefficient

**Supplementary Table S7. Molecular docking binding affinity of cinnamon components to TNF- $\alpha$ , MIF from M1 macrophage, and MMP-12 from M2 macrophage.**

| Compound                      | Binding Affinity (kcal/mol) |      |        |
|-------------------------------|-----------------------------|------|--------|
|                               | TNF- $\alpha$               | MIF  | MMP-12 |
| Cinnamic acid                 | -5.9                        | -7.2 | -6.6   |
| Ferulic acid                  | -6.6                        | -6.6 | -6.2   |
| <i>p</i> -Coumaric acid       | -6.2                        | -7.1 | -7.0   |
| <i>p</i> -Hydroxybenzoic acid | -5.3                        | -6.4 | -6.2   |
| Salicylic acid                | -5.4                        | -6.6 | -6.4   |

Tumor necrosis factor- $\alpha$  (TNF- $\alpha$ ) (PDBID: 2AZ5) as an inflammatory cytokine, MIF (PDBID: 1GD0) as a pro-inflammatory macrophage, MMP-12 (PDBID: 1JIZ) as an anti-inflammatory macrophage.

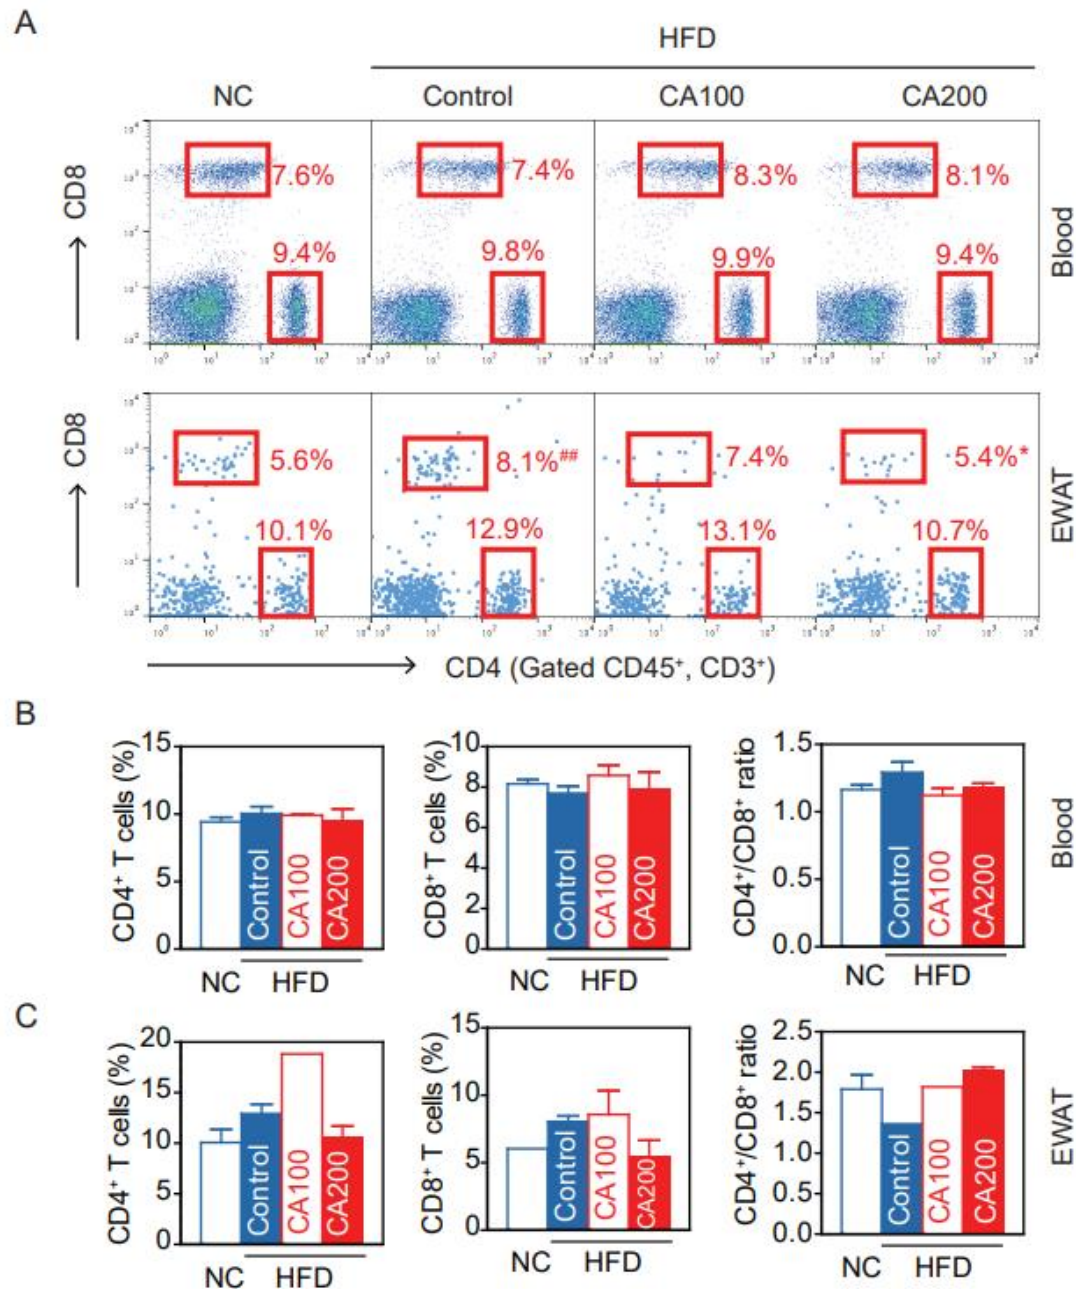

**Supplementary Figure S1.** T cell subtype in blood and epididymal white adipose tissue (EWAT) of HFD-induced obesity. (A) Flow cytometry analyses showing the fractions of T cells in blood or EWAT. (B) percentage of blood CD4<sup>+</sup> T cells, percentage of blood CD8<sup>+</sup> T cells, and ratio of CD4<sup>+</sup> and CD8<sup>+</sup> T cell in blood, (C) percentage of EWAT CD4<sup>+</sup> T cells, percentage of blood CD8<sup>+</sup> T cells, and ratio of CD4<sup>+</sup> and CD8<sup>+</sup> T cell in EWAT. Data are expressed as the mean ± SEM. NC: normal chow, Control: high-fat diet control, CA100: high-fat diet plus cinnamic acid 100 mg/kg, CA200: high-fat diet plus cinnamic acid 200 mg/kg.
